# Supplementary material
Source: PubMed Central journal article supplement (PMC2546540)

**Supporting Table 1. Mass spectrometry analysis of K63-linked Ub<sub>6</sub> and HMW complexes of K48-linked Ub<sub>6</sub>.**

| Ubiquitin linkages in total K63-linked Ub <sub>6</sub> sample |             | Ubiquitin linkages in high molecular weight species of K48-linked Ub <sub>6</sub> sample |             |
|---------------------------------------------------------------|-------------|------------------------------------------------------------------------------------------|-------------|
| Linkage                                                       | Content (%) | Linkage                                                                                  | Content (%) |
| K6                                                            | 1.03        | K6                                                                                       | 0.16        |
| K11                                                           | 0.62        | K11                                                                                      | 0.69        |
| K27                                                           | 0.31        | K27                                                                                      | 0.00        |
| K29                                                           | ND          | K29                                                                                      | ND          |
| K33                                                           | ND          | K33                                                                                      | 0.39        |
| K48                                                           | 0.33        | K48                                                                                      | 98.17       |
| K63                                                           | 97.72       | K63                                                                                      | 0.59        |

ND: not detected

Supporting Figure 1

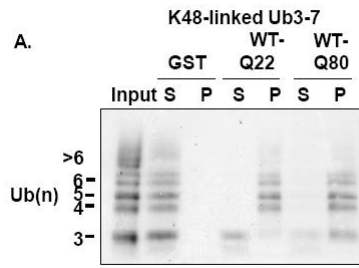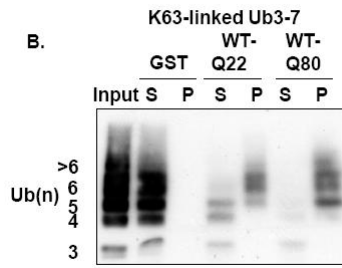

Supporting Figure 2

A.

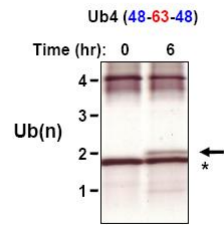

B.

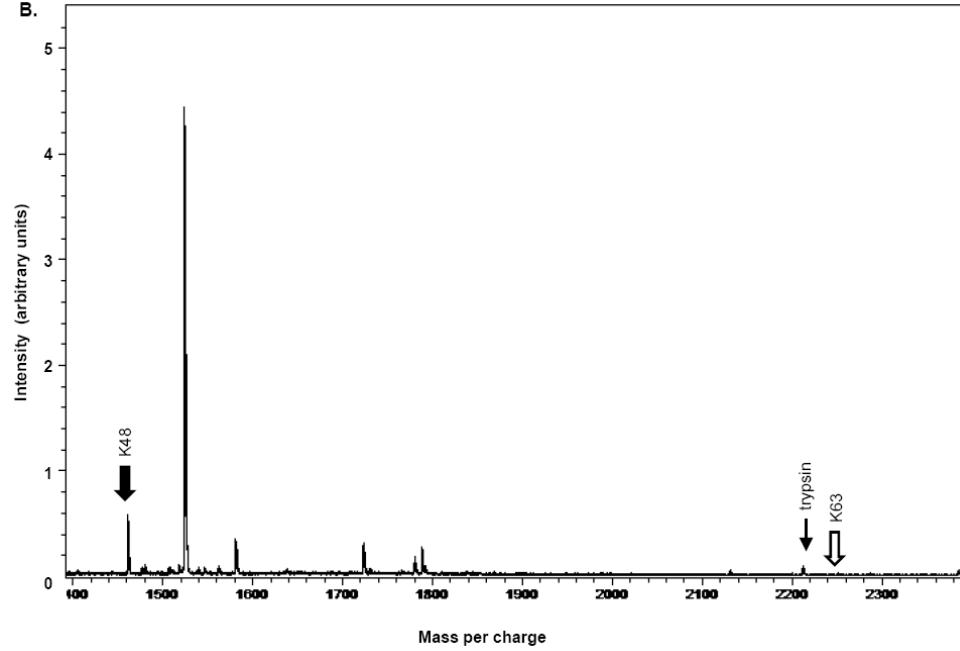

Supporting Figure 3

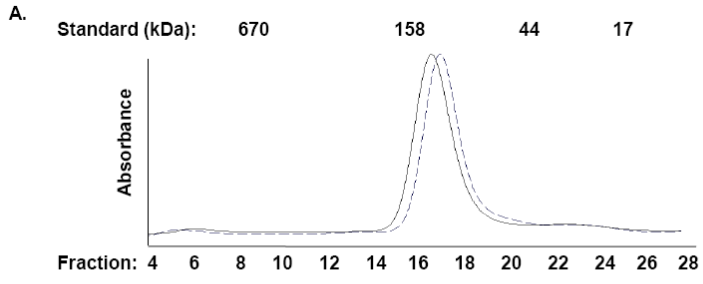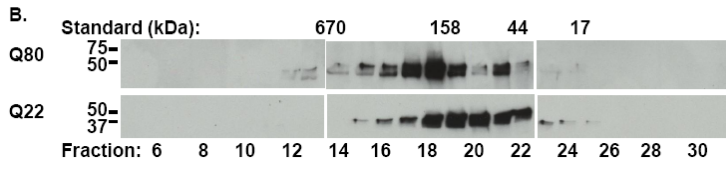

Supplement: M803692200_2.pdf [file M803692200_2.pdf]
